# Supplementary material for: Risk-stratification of febrile African children at risk of sepsis using sTREM-1 as basis for a rapid triage test
Source: PubMed Central journal article supplement (PMC8617180; doi:10.1038/s41467-021-27215-6), 2021-11-25
Supplement: 41467_2021_27215_MOESM1_ESM.pdf [file 41467_2021_27215_MOESM1_ESM.pdf]

**Risk-stratification of febrile African children at risk of sepsis using sTREM-1 as basis for a rapid triage test**

## **Supplementary Information**

## SUPPLEMENTARY INFORMATION TABLE OF CONTENTS

|                                                                                                                                                                                                                                                                                 |           |
|---------------------------------------------------------------------------------------------------------------------------------------------------------------------------------------------------------------------------------------------------------------------------------|-----------|
| <b>I. SUPPLEMENTARY TABLES .....</b>                                                                                                                                                                                                                                            | <b>3</b>  |
| SUPPLEMENTARY TABLE 1: BASELINE CHARACTERISTICS FOR DERIVATION AND VALIDATION COHORT .....                                                                                                                                                                                      | 3         |
| SUPPLEMENTARY TABLE 2: TREATMENTS REPORTED AT TIME OF PRESENTATION .....                                                                                                                                                                                                        | 4         |
| SUPPLEMENTARY TABLE 3: BASELINE CHARACTERISTICS BETWEEN DERIVATION AND VALIDATION COHORTS .....                                                                                                                                                                                 | 5         |
| SUPPLEMENTARY TABLE 4: BASELINE CHARACTERISTICS FOR CHILDREN WHO ABSCONDED AFTER 7 DAYS .....                                                                                                                                                                                   | 6         |
| SUPPLEMENTARY TABLE 5: BASELINE CHARACTERISTICS FOR CHILDREN WHO WERE TRANSFERRED AFTER 7 DAYS .....                                                                                                                                                                            | 7         |
| SUPPLEMENTARY TABLE 6: BIOMARKER GEOMETRIC MEANS IN COHORTS COMBINED AND DERIVATION AND VALIDATION COHORTS SEPARATELY .....                                                                                                                                                     | 8         |
| SUPPLEMENTARY TABLE 7: PERFORMANCE OF 4 BIOMARKERS QUANTIFIED IN ALL CHILDREN WITH AVAILABLE PLASMA IN DERIVATION, PRIMARY VALIDATION, AND SECONDARY VALIDATION COHORTS .....                                                                                                   | 9         |
| SUPPLEMENTARY TABLE 8: PERFORMANCE OF 4 BIOMARKERS QUANTIFIED IN ALL CHILDREN WITH AVAILABLE PLASMA IN THE DERIVATION, PRIMARY VALIDATION, AND SECONDARY VALIDATION COHORTS IN CHILDREN WITH AND WITHOUT <i>P. FALCIPARUM</i> MALARIA .....                                     | 10        |
| SUPPLEMENTARY TABLE 9: LIKELIHOOD RATIOS BASED ON sTREM-1 CUT-OFFS FROM THE 10 <sup>TH</sup> -99 <sup>TH</sup> PERCENTILE OF DISTRIBUTION IN 0.1 INCREMENTS OF THE NATURAL LOGARITHM OF sTREM-1 IN DERIVATION, PRIMARY VALIDATION, AND SECONDARY VALIDATION COHORTS .....       | 11        |
| SUPPLEMENTARY TABLE 10: FALSE POSITIVE AND NEGATIVES FOR sTREM-1 CUTOFFS FROM THE 10 <sup>TH</sup> -99 <sup>TH</sup> PERCENTILE OF DISTRIBUTION IN 0.1 INCREMENTS OF THE NATURAL LOGARITHM OF sTREM-1 IN DERIVATION, PRIMARY VALIDATION, AND SECONDARY VALIDATION COHORTS ..... | 12        |
| SUPPLEMENTARY TABLE 11: STUDIES EVALUATING PLASMA sTREM-1 FOR SEPSIS DIAGNOSIS OR OUTCOME .....                                                                                                                                                                                 | 13        |
| SUPPLEMENTARY TABLE 12: COEFFICIENT OF VARIANCE FOR INTRA-ASSAY PERFORMANCE OF 11 PLASMA BIOMARKERS .....                                                                                                                                                                       | 15        |
| <b>II. SUPPLEMENTARY FIGURES .....</b>                                                                                                                                                                                                                                          | <b>16</b> |
| SUPPLEMENTARY FIG. 1: BIOMARKER AUROCs FOR CHILDREN WHO DIED UP TO 7D OR WHO SURVIVED IN:...                                                                                                                                                                                    | 16        |
| a. Derivation cohort .....                                                                                                                                                                                                                                                      | 16        |
| b. Validation cohort .....                                                                                                                                                                                                                                                      | 16        |
| SUPPLEMENTARY FIG. 2: DISTRIBUTION OF sTREM-1 AND PROBABILITIES OF DEATH FOR: .....                                                                                                                                                                                             | 17        |
| a. Derivation Cohort .....                                                                                                                                                                                                                                                      | 17        |
| b. Validation Cohort .....                                                                                                                                                                                                                                                      | 18        |
| SUPPLEMENTARY FIG. 3: CALIBRATION PLOTS FOR LOG sTREM-1 VALUES WITH MULTIPLE IMPUTATIONS FROM: .....                                                                                                                                                                            | 19        |
| a. Primary Validation .....                                                                                                                                                                                                                                                     | 19        |
| b. Secondary Validation .....                                                                                                                                                                                                                                                   | 19        |
| SUPPLEMENTARY FIG. 4: CALIBRATION PLOTS FOR sTREM-1 ZONES WITH MULTIPLE IMPUTATIONS FROM: .....                                                                                                                                                                                 | 20        |
| a. Primary Validation .....                                                                                                                                                                                                                                                     | 20        |
| b. Secondary Validation .....                                                                                                                                                                                                                                                   | 20        |
| SUPPLEMENTARY FIG. 5: TIME-TO-EVENT ANALYSES BY sTREM-1 ZONES IN THE DERIVATION COHORT FOR: .....                                                                                                                                                                               | 21        |
| a. Whole derivation cohort .....                                                                                                                                                                                                                                                | 21        |
| b. Subgroup of derivation cohort with <i>P. falciparum</i> malaria .....                                                                                                                                                                                                        | 21        |
| c. Subgroup of derivation cohort without malaria .....                                                                                                                                                                                                                          | 21        |
| SUPPLEMENTARY FIG. 6: TIME-TO-EVENT ANALYSES BY sTREM-1 ZONES IN THE VALIDATION COHORT FOR: .....                                                                                                                                                                               | 22        |
| a. Whole validation cohort .....                                                                                                                                                                                                                                                | 22        |
| b. Subgroup of validation cohort with <i>P. falciparum</i> malaria .....                                                                                                                                                                                                        | 22        |
| c. Subgroup of validation cohort without malaria .....                                                                                                                                                                                                                          | 22        |
| <b>III. SUPPLEMENTARY REFERENCES .....</b>                                                                                                                                                                                                                                      | <b>23</b> |

## I. Supplementary Tables

**Supplementary Table 1: Baseline characteristics for derivation and validation cohort**

| Characteristic at baseline*         | Derivation Cohort |                   |                        | Validation Cohort |                   |                       |
|-------------------------------------|-------------------|-------------------|------------------------|-------------------|-------------------|-----------------------|
|                                     | Dead (n=43)       | Alive (n=1390)    | Odds ratio (95% CI)    | Dead (n=52)       | Alive (n=1017)    | Odds ratio (95% CI)   |
| Age, days                           | 18.1 (13.8)       | 19.2 (12.9)       | 0.84 (0.45 to 1.59)    | 18.3 (12.1)       | 20.4 (12.9)       | 0.70 (0.39 to 1.28)   |
| Male (n, %)                         | 25 (58)           | 760 (55)          | 1.15 (0.62 to 2.13)    | 29 (55.8)         | 562 (55.3)        | 0.99 (0.56 to 1.74)   |
| Time to MD, hr                      | 1.5 (1.6)         | 3.0 (2.5)         | 0.14 (0.05 to 0.37)    | 1.7 (1.8)         | 2.9 (2.1)         | 0.20 (0.09 to 0.45)   |
| Temperature                         | 37.5 (1.5)        | 37.9 (1.2)        | 0.50 (0.27 to 0.93)    | 37.2 (1.1)        | 37.8 (1.1)        | 0.33 (0.18 to 0.60)   |
| SpO2%                               | 91.9 (9.5)        | 97.2 (3.9)        | 0.37 (0.26 to 0.53)    | 89.8 (12.5)       | 96.9 (4.2)        | 0.33 (0.22 to 0.50)   |
| Heart rate                          | 156 (32)          | 161 (24)          | 0.70 (0.38 to 1.27)    | 164 (33)          | 161 (24)          | 1.29 (0.73 to 2.28)   |
| LODS (n, %)                         |                   |                   |                        |                   |                   |                       |
| 0                                   | 1 (2.3)           | 846 (60.9)        | 1.0 (reference)        | 2 (3.8)           | 666 (65.5)        | 1.0 (reference)       |
| 1                                   | 4 (9.3)           | 272 (19.6)        | 12.5 (1.4 to 112.2)    | 3 (5.8)           | 165 (16.2)        | 6.0 (1.0 to 36.5)     |
| 2                                   | 11 (25.6)         | 169 (12.2)        | 55.1 (7.0 to 430.4)    | 14 (26.9)         | 118 (11.6)        | 39.5 (8.8 to 176.3)   |
| 3                                   | 27 (62.8)         | 103 (7.4)         | 221.0 (29.7 to 1647.4) | 33 (63.5)         | 68 (6.7)          | 161.5 (37.9 to 689.0) |
| Lactate, mmol/L                     | 7.1 (1.2 to 41.0) | 3.3 (0.8 to 14.2) | 6.41 (3.53 to 11.64)   | 7.7 (1.4 to 41.7) | 3.3 (0.8 to 13.9) | 7.40 (4.16 to 13.17)  |
| <i>P. falciparum</i> Malaria (n, %) | 13 (30.2)         | 746 (53.7)        | 0.37 (0.19 to 0.72)    | 24 (46.2)         | 546 (53.7)        | 0.74 (0.42 to 1.29)   |
| HIV (n, %)                          | 4 (9.3)           | 29 (2.1)          | 4.89 (1.63 to 14.67)   | 1 (1.9)           | 13 (1.3)          | 1.55 (0.20 to 12.26)  |

Displayed are means (SD), geometric means with 95% reference range (Lactate), or numbers (%).

Derivation cohort included children prospectively consecutively enrolled between February 15, 2012 and October 31, 2012.

Validation cohort included children prospectively consecutively enrolled between November 1, 2012 and August 29, 2013

**Supplementary Table 2: Treatments reported at time of presentation**

|                                              | <b>Intervention</b>               | <b>Cohorts combined</b> | <b>Derivation cohort</b> | <b>Validation cohort</b> |
|----------------------------------------------|-----------------------------------|-------------------------|--------------------------|--------------------------|
| <b>All children</b>                          |                                   | 2502 (100%)             | 1433 (100%)              | 1069 (100%)              |
|                                              | Any antimalarial                  | 2003 (81.5%)            | 1133 (81.3%)             | 870 (81.8%)              |
|                                              | Any antibiotic                    | 1891 (76.7%)            | 1091 (77.9%)             | 800 (75.1%)              |
|                                              | Whole blood transfusion           | 868 (34.7%)             | 531 (37.1%)              | 337 (31.5%)              |
|                                              | IV fluids                         | 298 (12.2%)             | 213 (15.4%)              | 85 (8.0%)                |
|                                              | IV glucose                        | 564 (23.0%)             | 341 (24.6%)              | 223 (21.0%)              |
| <b><i>P. falciparum</i> Malaria positive</b> |                                   | 1329 (100%)             | 759 (100%)               | 570 (100%)               |
|                                              | Any antimalarial                  | 1275 (97.0%)            | 726 (97.3%)              | 549 (96.7%)              |
|                                              | IV Quinine only                   | 1034 (78.8%)            | 657 (88.2%)              | 377 (66.4%)              |
|                                              | Other antimalarial* only          | 171 (13.0%)             | 27 (3.6%)                | 144 (25.4%)              |
|                                              | IV Quinine and other antimalarial | 69 (5.3%)               | 41 (5.5%)                | 28 (4.9%)                |
| <b>IMCI pneumonia</b>                        |                                   | 1004 (100%)             | 611 (100%)               | 393 (100%)               |
|                                              | Supplemental O <sub>2</sub>       | 110 (11.2%)             | 55 (9.4%)                | 55 (14.0%)               |
|                                              | Time to antibiotics (hours)       | 14.5 (12.7, 17.8)       | 15.0 (12.3, 18.0)        | 14.5 (12.8, 17.5)        |
|                                              | Any antibiotic                    | 838 (84.5%)             | 500 (83.5%)              | 338 (86.0%)              |
|                                              | Ceftriaxone only                  | 229 (23.1%)             | 141 (23.5%)              | 88 (22.4%)               |
|                                              | Other antibiotic# only            | 342 (34.5%)             | 220 (36.7%)              | 122 (31%)                |
|                                              | Ceftriaxone and other antibiotic  | 267 (26.9%)             | 139 (23.2%)              | 128 (32.6%)              |

Data missingness for intervention variables ranged from 0.02% for whole blood transfusion to 2.4% for IV fluids.

\*Antimalarials: Artesunate, Coartem, Artesunate/Coartem combination, Artemether, Sulfadoxine/Pyrimethamine (Fansidar)

#Antibiotics: Ampicillin, Amoxicillin, Penicillin, Cloxacillin, Ampiclox, Cephalexin, Gentamicin, Trimethoprim-Sulfamethoxazole, Chloramphenicol, Metronidazole, Ciprofloxacin

**Supplementary Table 3: Baseline characteristics between derivation and validation cohorts**

| <b>Characteristic at baseline*</b> | <b>Derivation (n=1433)</b> | <b>Validation (n=1069)</b> | <b>Odds ratio (95% CI)</b> |
|------------------------------------|----------------------------|----------------------------|----------------------------|
| Age, months                        | 19.2 (12.9)                | 20.3 (12.9)                | 1.18 (1.01 to 1.39)        |
| Male (n, %)                        | 784 (54.7)                 | 591 (55.3)                 | 1.02 (0.87 to 1.20)        |
| Time to MD, hr                     | 3.0 (2.5)                  | 2.9 (2.1)                  | 0.88 (0.75 to 1.04)        |
| Temperature                        | 37.9 (1.2)                 | 37.8 (1.1)                 | 0.84 (0.72 to 0.99)        |
| SpO2%                              | 97.1 (4.2)                 | 96.6 (5.2)                 | 0.80 (0.68 to 0.95)        |
| Heart rate                         | 160.4 (24.4)               | 160.8 (24.7)               | 1.04 (0.88 to 1.22)        |
| LODS (n, %)                        |                            |                            |                            |
| 0                                  | 847 (59.1)                 | 668 (62.5)                 | 1.00 (reference)           |
| 1                                  | 276 (19.3)                 | 168 (15.7)                 | 0.77 (0.62 to 0.96)        |
| 2                                  | 180 (12.6)                 | 131 (12.3)                 | 0.92 (0.72 to 1.18)        |
| 3                                  | 130 (9.1)                  | 101 (9.4)                  | 0.98 (0.74 to 1.30)        |
| Lactate, mmol/L                    | 3.4 (0.8 to 14.9)          | 3.4 (0.8 to 15.4)          | 1.04 (0.88 to 1.22)        |
| <i>P. falciparum</i>               | 759 (53.0)                 | 570 (53.3)                 | 1.01 (0.87 to 1.19)        |
| Malaria (n, %)                     |                            |                            |                            |
| HIV (n, %)                         | 35 (2.4)                   | 15 (1.4)                   | 0.56 (0.29 to 1.08)        |

Displayed are means (SD), geometric means with 95% reference range (Lactate), or numbers (%). Odds ratios are for the comparison of children in derivation and validation cohorts in case of binary or categorical characteristics, and per 2 standard deviations in case of continuous characteristics to allow direct comparison of odds ratios.<sup>1</sup> An odds ratio <1.0 indicates that averages or percentages were lower in the validation cohort.

Derivation cohort included children prospectively consecutively enrolled between February 15, 2012 and October 31, 2012.

Validation cohort included children prospectively consecutively enrolled between November 1, 2012 and August 29, 2013

**Supplementary Table 4: Baseline characteristics for children who absconded after 7 days**

| Characteristic at baseline*         | Absconded (n=337) | Discharged (n=2039) | Odds ratio (95% CI) |
|-------------------------------------|-------------------|---------------------|---------------------|
| Age, months                         | 18.1 (12.3)       | 20.0 (13.0)         | 0.74 (0.58 to 0.95) |
| Male (n, %)                         | 183 (54.3)        | 1122 (55.0)         | 0.97 (0.77 to 1.23) |
| Time to MD, hr                      | 3.0 (2.5)         | 3.0 (2.4)           | 1.00 (0.79 to 1.26) |
| Temperature                         | 37.7 (1.2)        | 37.9 (1.2)          | 0.74 (0.58 to 0.94) |
| SpO2%                               | 97.3 (4.0)        | 97.1 (4.0)          | 1.10 (0.82 to 1.48) |
| Heart rate                          | 161.2 (24.3)      | 160.5 (24.2)        | 1.06 (0.84 to 1.35) |
| LODS (n, %)                         |                   |                     |                     |
| 0                                   | 201 (59.6)        | 1298 (63.7)         | 1.00 (reference)    |
| 1                                   | 53 (15.7)         | 379 (18.6)          | 0.91 (0.66 to 1.26) |
| 2                                   | 49 (14.5)         | 232 (11.4)          | 1.36 (0.96 to 1.91) |
| 3                                   | 34 (10.1)         | 130 (6.4)           | 1.70 (1.13 to 2.55) |
| Lactate, mmol/L                     | 3.7 (0.8 to 16.8) | 3.2 (0.8 to 13.3)   | 1.51 (1.19 to 1.91) |
| <i>P. falciparum</i> Malaria (n, %) | 172 (51.0)        | 1106 (54.2)         | 0.88 (0.70 to 1.11) |
| HIV (n, %)                          | 3 (0.9)           | 38 (1.9)            | 0.47 (0.15 to 1.45) |

Displayed are means (SD), geometric means with 95% reference range (Lactate), or numbers (%). Odds ratios are for the comparison of children who absconded with children who were regularly discharged from hospital or survived up to 7 days in case of binary or categorical characteristics, and per 2 standard deviations in case of continuous characteristics to allow direct comparison of odds ratios.<sup>1</sup> An odds ratio <1.0 indicates that averages or percentages were lower in children who absconded.

Derivation cohort included children prospectively consecutively enrolled between February 15, 2012 and October 31, 2012.

Validation cohort included children prospectively consecutively enrolled between November 1, 2012 and August 29, 2013

**Supplementary Table 5: Baseline characteristics for children who were transferred after 7 days**

| Characteristic at baseline*         | Transferred (n=31) | Discharged (n=2039) | Odds ratio (95% CI)  |
|-------------------------------------|--------------------|---------------------|----------------------|
| Age, months                         | 19.9 (15.4)        | 20.0 (13.0)         | 0.99 (0.49 to 2.01)  |
| Male (n, %)                         | 17 (54.8)          | 1122 (55.0)         | 0.99 (0.49 to 2.03)  |
| Time to MD, hr                      | 2.0 (2.0)          | 3.0 (2.4)           | 0.33 (0.13 to 0.83)  |
| Temperature                         | 37.5 (0.9)         | 37.9 (1.2)          | 0.52 (0.25 to 1.08)  |
| SpO2%                               | 95.9 (5.7)         | 97.1 (4.0)          | 0.68 (0.43 to 1.08)  |
| Heart rate                          | 163.7 (21.3)       | 160.5 (24.2)        | 1.32 (0.63 to 2.76)  |
| LODS (n, %)                         |                    |                     |                      |
| 0                                   | 13 (41.9)          | 1298 (63.7)         | 1.00 (reference)     |
| 1                                   | 5 (16.1)           | 379 (18.6)          | 1.32 (0.47 to 3.72)  |
| 2                                   | 6 (19.4)           | 232 (11.4)          | 2.58 (0.97 to 6.86)  |
| 3                                   | 7 (22.6)           | 130 (6.4)           | 5.37 (2.10 to 13.71) |
| Lactate, mmol/L                     | 6.0 (1.0 to 34.5)  | 3.2 (0.8 to 13.3)   | 4.59 (2.26 to 9.32)  |
| <i>P. falciparum</i> Malaria (n, %) | 14 (45.2)          | 1106 (54.2)         | 0.69 (0.34 to 1.42)  |
| HIV (n, %)                          | 0 (0.0)            | 38 (1.9)            | NE                   |

Displayed are means (SD), geometric means with 95% reference range (Lactate), or numbers (%). Odds ratios are for the comparison of children who were transferred with children who were regularly discharged from hospital or survived up to 7 days in case of binary or categorical characteristics, and per 2 standard deviations in case of continuous characteristics to allow direct comparison of odds ratios.<sup>1</sup> An odds ratio <1.0 indicates that averages or percentages were lower in children who were transferred.

**Supplementary Table 6: Biomarker geometric means in cohorts combined and derivation and validation cohorts separately.**

| Biomarker<br>(pg/mL) | Cohorts combined           |                            | Derivation cohort          |                            | Validation cohort          |                            |
|----------------------|----------------------------|----------------------------|----------------------------|----------------------------|----------------------------|----------------------------|
|                      | Alive<br>(n=1989)          | Dead<br>(n=95)             | Alive<br>(n=984)           | Dead<br>(n=42)             | Alive<br>(n=1005)          | Dead<br>(n=53)             |
|                      | Geometric mean<br>(95% RR) | Geometric mean<br>(95% RR) | Geometric mean<br>(95% RR) | Geometric mean<br>(95% RR) | Geometric mean<br>(95% RR) | Geometric mean<br>(95% RR) |
| <b>sTREM-1</b>       | 231 (64 to 829)            | 792 (187 to 3360)          | 237 (65 to 861)            | 864 (181 to 4136)          | 222 (63 to 785)            | 736 (194 to 2802)          |
| <b>sFlt1</b>         | 394 (53 to 2911)           | 1499 (138 to 16328)        | 413 (56 to 3046)           | 1793 (189 to 16998)        | 369 (50 to 2719)           | 1292 (108 to 15423)        |
| <b>IL-8</b>          | 13 (1 to 273)              | 172 (2 to 18748)           | 13 (1 to 285)              | 234 (2 to 25175)           | 14 (1 to 257)              | 134 (1 to 14478)           |
| <b>Ang-2</b>         | 8004 (1954 to 32787)       | 20221 (4522 to 90428)      | 8093 (1979 to 33098)       | 23264 (5101 to 106108)     | 7884 (1920 to 32372)       | 18007 (4202 to 77165)      |
| <b>CHI3L1</b>        | 44 (4 to 490)              | 234 (10 to 5454)           | 46 (4 to 486)              | 303 (13 to 7102)           | 42 (4 to 493)              | 189 (8 to 4233)            |
| <b>sTNFR1</b>        | 3171 (821 to 12254)        | 7698 (1349 to 43925)       | 3427 (914 to 12847)        | 8341 (1417 to 49120)       | 2853 (729 to 11165)        | 7204 (1289 to 40266)       |
| <b>IL-6</b>          | 34 (1 to 1260)             | 471 (2 to 95973)           | 35 (1 to 1237)             | 745 (4 to 138289)          | 32 (1 to 1288)             | 322 (2 to 66095)           |
| <b>sICAM-1</b>       | 556 (49 to 6275)           | 898 (67 to 12114)          | 584 (51 to 6631)           | 1062 (83 to 13547)         | 522 (47 to 5807)           | 782 (56 to 10950)          |
| <b>sVCAM-1</b>       | 3910 (805 to 19004)        | 6042 (973 to 37525)        | 4107 (885 to 19057)        | 7059 (925 to 53894)        | 3664 (716 to 18744)        | 5313 (1061 to 26605)       |
| <b>IP-10</b>         | 13 (1 to 273)              | 172 (2 to 18748)           | 13 (1 to 285)              | 234 (2 to 25175)           | 14 (1 to 257)              | 134 (1 to 14478)           |
| <b>Ang-1</b>         | 2606 (241 to 28204)        | 1300 (130 to 12963)        | 2793 (265 to 29473)        | 1433 (111 to 18566)        | 2378 (215 to 26312)        | 1200 (151 to 9508)         |

Data displayed for children with complete follow up and available plasma (n=2084) without imputed data.

RR: Reference range

Derivation cohort included children prospectively consecutively enrolled between February 15, 2012 and October 31, 2012.

Validation cohort included children prospectively consecutively enrolled between November 1, 2012 and August 29, 2013



**Supplementary Table 7: Performance of 4 biomarkers quantified in all children with available plasma in derivation, primary validation, and secondary validation cohorts**

| Biomarker      | Derivation<br>(n=1406) | Primary validation<br>(n=1406) | Secondary validation<br>(n=1054) |
|----------------|------------------------|--------------------------------|----------------------------------|
|                | AUROC (95% CI)         | AUROC (95% CI)                 | AUROC (95% CI)                   |
| <b>sTREM-1</b> | 0.875 (0.826 to 0.924) | 0.876 (0.825 to 0.928)         | 0.885 (0.841 to 0.929)           |
| <b>sFlt1</b>   | 0.848 (0.780 to 0.917) | 0.846 (0.783 to 0.908)         | 0.786 (0.718 to 0.853)           |
| <b>Ang-2</b>   | 0.832 (0.775 to 0.889) | 0.836 (0.776 to 0.896)         | 0.778 (0.711 to 0.844)           |
| <b>sTNFR1</b>  | 0.777 (0.690 to 0.863) | 0.771 (0.696 to 0.846)         | 0.784 (0.707 to 0.861)           |

AUROC: Area under the receiver operating characteristic curve; CI: confidence interval. Analyses based on multiple imputation to account for missing vital status in children who were transferred or absconded before 7 days, with all baseline characteristics and in-hospital death up to 7 days as variables in the imputation model to create 20 imputed datasets.

Primary validation was performed in the derivation cohort based on 500 bootstrap samples with replacement). Secondary validation was performed in the temporally defined validation cohort.

**Supplementary Table 8: Performance of 4 biomarkers quantified in all children with available plasma in the derivation, primary validation, and secondary validation cohorts in children with and without *P. falciparum* malaria**

| Biomarker                                        | Derivation             | Primary validation     | Secondary validation   |
|--------------------------------------------------|------------------------|------------------------|------------------------|
|                                                  | AUROC (95% CI)         | AUROC (95% CI)         | AUROC (95% CI)         |
| <b><i>P. falciparum</i><br/>malaria positive</b> | n=746                  | n=746                  | n=565                  |
| <b>sTREM-1</b>                                   | 0.924 (0.850 to 0.998) | 0.924 (0.849 to 0.998) | 0.931 (0.898 to 0.964) |
| <b>sFlt1</b>                                     | 0.948 (0.884 to 1.011) | 0.948 (0.886 to 1.010) | 0.875 (0.821 to 0.928) |
| <b>Ang-2</b>                                     | 0.849 (0.754 to 0.944) | 0.851 (0.757 to 0.944) | 0.857 (0.807 to 0.907) |
| <b>sTNFR1</b>                                    | 0.846 (0.736 to 0.956) | 0.844 (0.733 to 0.954) | 0.851 (0.791 to 0.910) |
| <b><i>P. falciparum</i><br/>malaria negative</b> | n=660                  | n=660                  | n=489                  |
| <b>sTREM-1</b>                                   | 0.876 (0.812 to 0.939) | 0.876 (0.816 to 0.937) | 0.871 (0.821 to 0.922) |
| <b>sFlt1</b>                                     | 0.860 (0.789 to 0.932) | 0.861 (0.794 to 0.928) | 0.826 (0.767 to 0.884) |
| <b>Ang-2</b>                                     | 0.831 (0.757 to 0.904) | 0.833 (0.762 to 0.904) | 0.781 (0.719 to 0.843) |
| <b>sTNFR1</b>                                    | 0.806 (0.716 to 0.895) | 0.805 (0.719 to 0.892) | 0.789 (0.720 to 0.857) |

AUROC: Area under the receiver operating characteristic curve; CI: confidence interval. Analyses based on multiple imputation to account for missing vital status in children who were transferred or absconded before 7 days, with all baseline characteristics and in-hospital death up to 7 days as variables in the imputation model to create 20 imputed datasets.

Primary validation was performed in the derivation cohort based on 500 bootstrap samples with replacement). Secondary validation was performed in the temporally defined validation cohort.

**Supplementary Table 9: Likelihood ratios based on sTREM-1 cut-offs from the 10<sup>th</sup>-99<sup>th</sup> percentile of distribution in 0.1 increments of the natural logarithm of sTREM-1 in derivation, primary validation, and secondary validation cohorts**

| Interval<br>(pg/mL) | Positive Likelihood Ratio |                                |                                  | Negative Likelihood Ratio |                                |                                  |
|---------------------|---------------------------|--------------------------------|----------------------------------|---------------------------|--------------------------------|----------------------------------|
|                     | Derivation<br>(n=1406)    | Primary validation<br>(n=1406) | Secondary validation<br>(n=1054) | Derivation<br>(n=1406)    | Primary validation<br>(n=1406) | Secondary validation<br>(n=1054) |
| 108                 | 1.2 (1.1 to 1.2)          | 1.1 (1.1 to 1.1)               | 1.2 (1.1 to 1.2)                 | 0.13 (0.02 to 0.92)       | 0.04 (0.00 to 0.20)            | 0.15 (0.02 to 1.19)              |
| 119                 | 1.2 (1.2 to 1.2)          | 1.2 (1.1 to 1.2)               | 1.2 (1.2 to 1.3)                 | 0.12 (0.02 to 0.92)       | 0.03 (0.00 to 0.14)            | 0.14 (0.02 to 0.90)              |
| 132                 | 1.3 (1.2 to 1.3)          | 1.2 (1.1 to 1.3)               | 1.3 (1.2 to 1.4)                 | 0.10 (0.01 to 0.72)       | 0.13 (0.00 to 0.39)            | 0.11 (0.02 to 0.63)              |
| 146                 | 1.4 (1.3 to 1.4)          | 1.3 (1.2 to 1.3)               | 1.4 (1.4 to 1.5)                 | 0.09 (0.01 to 0.57)       | 0.11 (0.00 to 0.32)            | 0.09 (0.02 to 0.49)              |
| 161                 | 1.5 (1.4 to 1.6)          | 1.4 (1.3 to 1.4)               | 1.6 (1.5 to 1.7)                 | 0.08 (0.01 to 0.55)       | 0.10 (0.00 to 0.27)            | 0.07 (0.01 to 0.41)              |
| 178                 | 1.6 (1.5 to 1.7)          | 1.5 (1.4 to 1.6)               | 1.7 (1.6 to 1.9)                 | 0.08 (0.01 to 0.44)       | 0.09 (0.00 to 0.25)            | 0.12 (0.02 to 0.59)              |
| 197                 | 1.8 (1.7 to 2.0)          | 1.6 (1.5 to 1.7)               | 2.0 (1.8 to 2.1)                 | 0.07 (0.01 to 0.40)       | 0.08 (0.00 to 0.22)            | 0.12 (0.03 to 0.40)              |
| 217                 | 2.1 (1.9 to 2.2)          | 1.8 (1.7 to 2.0)               | 2.2 (2.0 to 2.5)                 | 0.06 (0.01 to 0.34)       | 0.08 (0.00 to 0.20)            | 0.13 (0.04 to 0.38)              |
| 240                 | 2.3 (2.1 to 2.5)          | 2.1 (1.9 to 2.3)               | 2.6 (2.3 to 2.9)                 | 0.12 (0.02 to 0.56)       | 0.07 (0.00 to 0.18)            | 0.11 (0.04 to 0.32)              |
| 266                 | 2.7 (2.4 to 3.0)          | 2.3 (2.1 to 2.6)               | 3.1 (2.8 to 3.5)                 | 0.14 (0.05 to 0.41)       | 0.12 (0.00 to 0.26)            | 0.13 (0.05 to 0.35)              |
| 293                 | 3.0 (2.7 to 3.4)          | 2.7 (2.3 to 3.0)               | 3.7 (3.2 to 4.2)                 | 0.18 (0.07 to 0.43)       | 0.15 (0.01 to 0.28)            | 0.17 (0.07 to 0.39)              |
| 324                 | 3.5 (3.0 to 4.0)          | 3.0 (2.6 to 3.4)               | 4.5 (3.8 to 5.2)                 | 0.20 (0.09 to 0.42)       | 0.18 (0.05 to 0.32)            | 0.18 (0.09 to 0.36)              |
| 358                 | 3.8 (3.2 to 4.4)          | 3.5 (3.0 to 4.1)               | 5.1 (4.3 to 6.0)                 | 0.31 (0.16 to 0.61)       | 0.20 (0.06 to 0.34)            | 0.28 (0.14 to 0.52)              |
| 396                 | 4.2 (3.4 to 5.2)          | 3.8 (3.0 to 4.5)               | 5.9 (4.8 to 7.3)                 | 0.38 (0.23 to 0.63)       | 0.32 (0.16 to 0.48)            | 0.27 (0.17 to 0.44)              |
| 438                 | 5.4 (4.3 to 6.8)          | 4.2 (3.3 to 5.2)               | 7.0 (5.6 to 8.7)                 | 0.37 (0.24 to 0.56)       | 0.39 (0.23 to 0.55)            | 0.32 (0.20 to 0.51)              |
| 484                 | 6.7 (5.2 to 8.5)          | 5.4 (4.1 to 6.7)               | 7.6 (5.9 to 9.7)                 | 0.40 (0.27 to 0.60)       | 0.37 (0.22 to 0.53)            | 0.39 (0.26 to 0.59)              |
| 535                 | 8.0 (6.1 to 10.5)         | 6.7 (4.9 to 8.5)               | 9.9 (7.5 to 13.2)                | 0.41 (0.28 to 0.60)       | 0.41 (0.26 to 0.56)            | 0.40 (0.28 to 0.57)              |
| 591                 | 10.2 (7.6 to 13.7)        | 8.0 (5.7 to 10.3)              | 11.4 (8.3 to 15.7)               | 0.41 (0.28 to 0.59)       | 0.42 (0.27 to 0.57)            | 0.43 (0.31 to 0.61)              |
| 653                 | 11.2 (8.2 to 15.3)        | 10.2 (7.0 to 13.3)             | 10.9 (7.7 to 15.5)               | 0.48 (0.34 to 0.68)       | 0.41 (0.27 to 0.56)            | 0.55 (0.40 to 0.75)              |
| 722                 | 12.2 (8.6 to 17.4)        | 11.4 (7.4 to 15.4)             | 12.6 (8.4 to 18.9)               | 0.54 (0.39 to 0.73)       | 0.48 (0.33 to 0.63)            | 0.56 (0.44 to 0.72)              |
| 798                 | 12.7 (8.5 to 18.8)        | 12.3 (7.6 to 17.1)             | 12.8 (8.3 to 19.8)               | 0.59 (0.45 to 0.78)       | 0.54 (0.39 to 0.68)            | 0.58 (0.45 to 0.74)              |
| 882                 | 16.4 (10.6 to 25.3)       | 13.0 (7.4 to 18.6)             | 12.5 (7.9 to 19.6)               | 0.61 (0.48 to 0.77)       | 0.59 (0.45 to 0.73)            | 0.68 (0.54 to 0.86)              |
| 974                 | 20.5 (12.7 to 33.1)       | 17.1 (8.9 to 25.3)             | 13.0 (7.6 to 22.4)               | 0.62 (0.49 to 0.78)       | 0.60 (0.47 to 0.74)            | 0.78 (0.65 to 0.94)              |
| 1077                | 23.1 (13.8 to 38.8)       | 21.8 (9.5 to 34.1)             | 15.4 (7.8 to 30.4)               | 0.67 (0.53 to 0.83)       | 0.62 (0.48 to 0.76)            | 0.82 (0.71 to 0.94)              |
| 1190                | 26.0 (14.5 to 46.3)       | 24.9 (9.1 to 40.7)             | 16.6 (7.5 to 36.4)               | 0.72 (0.59 to 0.88)       | 0.66 (0.53 to 0.79)            | 0.85 (0.74 to 0.96)              |
| 1315                | 17.3 (8.9 to 33.7)        | 28.4 (7.6 to 49.2)             | 18.9 (7.6 to 46.9)               | 0.82 (0.69 to 0.97)       | 0.72 (0.59 to 0.84)            | 0.88 (0.78 to 0.99)              |
| 1454                | 22.7 (10.7 to 48.3)       | 19.0 (3.6 to 34.4)             | 22.3 (7.7 to 64.7)               | 0.87 (0.76 to 0.99)       | 0.81 (0.70 to 0.92)            | 0.88 (0.79 to 0.97)              |

**Supplementary Table 10: False positive and negatives for sTREM-1 cutoffs from the 10<sup>th</sup>-99<sup>th</sup> percentile of distribution in 0.1 increments of the natural logarithm of sTREM-1 in derivation, primary validation, and secondary validation cohorts**

| Interval<br>(pg/mL) | False Positive         |                                |                                  | False negative         |                                |                                  |
|---------------------|------------------------|--------------------------------|----------------------------------|------------------------|--------------------------------|----------------------------------|
|                     | Derivation<br>(n=1406) | Primary validation<br>(n=1406) | Secondary validation<br>(n=1054) | Derivation<br>(n=1406) | Primary validation<br>(n=1406) | Secondary validation<br>(n=1054) |
| 108                 | 86.3%                  | 86.4%                          | 84.0%                            | 0.0%                   | 0.0%                           | 0.1%                             |
| 119                 | 82.5%                  | 82.5%                          | 80.0%                            | 0.0%                   | 0.0%                           | 0.1%                             |
| 132                 | 78.9%                  | 78.9%                          | 74.7%                            | 0.1%                   | 0.1%                           | 0.2%                             |
| 146                 | 73.5%                  | 73.5%                          | 70.4%                            | 0.1%                   | 0.1%                           | 0.2%                             |
| 161                 | 68.8%                  | 68.8%                          | 63.2%                            | 0.1%                   | 0.1%                           | 0.2%                             |
| 178                 | 62.5%                  | 62.5%                          | 57.7%                            | 0.1%                   | 0.1%                           | 0.2%                             |
| 197                 | 57.5%                  | 57.5%                          | 51.4%                            | 0.1%                   | 0.1%                           | 0.3%                             |
| 217                 | 50.8%                  | 50.7%                          | 45.1%                            | 0.1%                   | 0.1%                           | 0.4%                             |
| 240                 | 44.6%                  | 44.6%                          | 39.3%                            | 0.1%                   | 0.1%                           | 0.4%                             |
| 266                 | 38.5%                  | 38.5%                          | 33.3%                            | 0.3%                   | 0.3%                           | 0.4%                             |
| 293                 | 32.8%                  | 32.8%                          | 27.5%                            | 0.4%                   | 0.4%                           | 0.5%                             |
| 324                 | 28.1%                  | 28.1%                          | 22.3%                            | 0.5%                   | 0.5%                           | 0.7%                             |
| 358                 | 23.4%                  | 23.3%                          | 18.1%                            | 0.6%                   | 0.6%                           | 0.8%                             |
| 396                 | 19.1%                  | 19.0%                          | 14.3%                            | 0.9%                   | 0.9%                           | 1.3%                             |
| 438                 | 15.5%                  | 15.4%                          | 12.3%                            | 1.2%                   | 1.2%                           | 1.3%                             |
| 484                 | 12.0%                  | 12.0%                          | 9.7%                             | 1.2%                   | 1.2%                           | 1.6%                             |
| 535                 | 9.2%                   | 9.1%                           | 8.0%                             | 1.4%                   | 1.4%                           | 2.0%                             |
| 591                 | 7.5%                   | 7.5%                           | 5.9%                             | 1.4%                   | 1.4%                           | 2.1%                             |
| 653                 | 5.8%                   | 5.8%                           | 4.9%                             | 1.4%                   | 1.4%                           | 2.3%                             |
| 722                 | 4.7%                   | 4.7%                           | 4.1%                             | 1.7%                   | 1.7%                           | 2.9%                             |
| 798                 | 3.8%                   | 3.8%                           | 3.4%                             | 1.9%                   | 1.9%                           | 3.0%                             |
| 882                 | 3.3%                   | 3.2%                           | 3.3%                             | 2.1%                   | 2.1%                           | 3.1%                             |
| 974                 | 2.4%                   | 2.4%                           | 2.5%                             | 2.2%                   | 2.2%                           | 3.7%                             |
| 1077                | 1.8%                   | 1.8%                           | 1.7%                             | 2.3%                   | 2.2%                           | 4.3%                             |
| 1190                | 1.4%                   | 1.4%                           | 1.2%                             | 2.4%                   | 2.4%                           | 4.4%                             |
| 1315                | 1.1%                   | 1.1%                           | 0.9%                             | 2.6%                   | 2.6%                           | 4.6%                             |
| 1454                | 1.1%                   | 1.1%                           | 0.6%                             | 3.0%                   | 3.0%                           | 4.8%                             |

**Supplementary Table 11: Studies evaluating plasma sTREM-1 for sepsis diagnosis or outcome**

| Study                                   | Study type | Country     | Entry criteria                                                                | Number of children | Age group                | Mortality    | sTREM-1 cut-off (pg/mL) | Sepsis AUROC (95% CI) | Mortality AUROC (95% CI) | sTREM-1 assay               |
|-----------------------------------------|------------|-------------|-------------------------------------------------------------------------------|--------------------|--------------------------|--------------|-------------------------|-----------------------|--------------------------|-----------------------------|
| Pontrelli, 2016 <sup>2</sup>            | SR         | N/A         | Variable                                                                      | 961                | Neonates and children    | N/A          | N/A                     | -                     | -                        | N/A                         |
| Bellos, 2018 <sup>3</sup>               | MA         | N/A         | Variable                                                                      | 667                | Neonates                 | N/A          | N/A                     | 0.95<br>(0.81–0.99)   | -                        | N/A                         |
| Saldir, 2015 <sup>4*</sup>              | PCS        | Turkey      | Deterioration due to possible sepsis in NICU                                  | 60                 | Neonates >34wk GA        | 0%           | 450                     | 0.97<br>(0.93-1.0)    | -                        | Quantikine ELISA, R&D       |
| Stein, 2015 <sup>5*</sup>               | PCS        | Israel      | ER presentation with suspected SBI                                            | 112                | Neonates (<3 months)     | Not reported | 600                     | 0.61<br>(0.47-0.74)   | -                        | Quantikine ELISA, R&D       |
| Mazzucchelli, 2013 <sup>6*</sup>        | PCS        | Italy       | NICU, d5-15 of life, 16 children with and 16 without LONS d16-25              | 32                 | Preterm infants <32wk GA | Not reported | N/A                     | 0.80<br>(0.63-0.92)   | -                        | Flow cytometry, ELISA, R&D  |
| Schlapbach, 2013 <sup>7*</sup>          | POS        | Switzerland | NICU admission with suspected EOS                                             | 137                | Neonates >34wk GA        | 0%           | 1250                    | 0.54<br>(0.41-0.67)   | -                        | Duaset ELISA, R&D           |
| Sarafidis, 2010 <sup>8*</sup>           | PCS        | Greece      | Suspected LONS in NICU                                                        | 52                 | Neonates                 | 15.4%        | 143.35                  | 0.73<br>(0.59-0.88)   | -                        | Quantikine ELISA, R&D       |
| Chen, 2008 <sup>9</sup>                 | PCS        | Taiwan      | Hospital admission with suspected SBI                                         | 44                 | Neonates (<3 months)     | Not reported | 24400                   | 0.88                  | -                        | Not reported                |
| Carrol, 2009 <sup>10</sup>              | PCS        | Malawi      | ER presentation with pneumonia or meningitis                                  | 377                | 2 months-16 years        | 22.0%        | 25000                   | 0.52<br>(0.43-0.61)   | 0.54<br>(0.44-0.64)      | Quantikine ELISA, R&D       |
| Kevan, 2011 <sup>11</sup>               | PCS        | USA         | Gastrointestinal disease requiring TPN/CVC                                    | 24                 | 3 months-4 years         | 16.7%        | N/A                     | -                     | -                        | Quantikine ELISA, R&D       |
| Miedema, 2011 <sup>12</sup>             | PCS        | Holland     | Oncology patients on chemotherapy with fever and ANC <500/mm <sup>3</sup>     | 29                 | 1-15 years               | Not reported | N/A                     | -                     | -                        | ELISA, unknown manufacturer |
| Arzanian, 2011 <sup>13</sup>            | PCS        | Iran        | Hematology ward admission with malignancy, fever and ANC <500/mm <sup>3</sup> | 65                 | 15 months-15 years       | 4.6%         | 525                     | 0.97                  | -                        | Duaset ELISA, R&D           |
| Arizaga-Ballesteros, 2015 <sup>14</sup> | PCS        | Mexico      | Suspected LONS in NICU                                                        | 71                 | Neonates                 | 7.0%         | 300                     | -                     | 0.88<br>(0.73-1.00)      | ELISA, ab100659, Abcam      |

|                            |     |        |                                                   |     |                   |       |                                           |                     |                     |                          |
|----------------------------|-----|--------|---------------------------------------------------|-----|-------------------|-------|-------------------------------------------|---------------------|---------------------|--------------------------|
| Adly, 2014 <sup>15*</sup>  | PCS | Egypt  | 112 confirmed sepsis in NICU, 40 healthy newborns | 152 | Neonates          | 24.1% | 310<br>(diagnosis)<br>1100<br>(mortality) | 1.00<br>(0.70-1.02) | 0.98<br>(0.85-1.13) | Quantikine<br>ELISA, R&D |
| Erdman, 2011 <sup>16</sup> | CCS | Uganda | ER presentation with severe malaria               | 103 | 6 months-12 years | 22.3% | 289.9                                     | -                   | 0.76<br>(0.66-0.84) | Duoset<br>ELISA, R&D     |

\*Considered for inclusion in meta-analysis by Bellos, *et al.*<sup>3</sup> Sequence of studies corresponds to the sequence presented in the Research in Context section. SR: Systematic Review; MA: Meta-analysis; PCS: Prospective cohort study; CCS: Case-control study; NICU: Neonatal Intensive Care Unit; LONS: Late onset neonatal sepsis (>72h after birth); ER: Emergency room; SBI: Serious bacterial infection; EOS: Early onset sepsis (<72h of birth); GA: Gestational Age; N/A: not applicable; TPN: Total Parenteral Nutrition; CVC: Central Venous Catheter; ANC: Absolute Neutrophil Count

**Supplementary Table 12: Coefficient of variance for intra-assay performance of 11 plasma biomarkers**

| <b>Biomarker</b> | <b>N</b> | <b>Coefficient of Variation<br/>(95% CI)</b> |
|------------------|----------|----------------------------------------------|
| <b>sTREM-1</b>   | 156      | 2.77 (2.42 to 3.12)                          |
| <b>sFlt1</b>     | 156      | 2.34 (2.00 to 2.68)                          |
| <b>IL-8</b>      | 153      | 2.61 (2.08 to 3.14)                          |
| <b>Ang-2</b>     | 176      | 2.24 (1.98 to 2.50)                          |
| <b>CHI3L1</b>    | 152      | 3.03 (2.51 to 3.55)                          |
| <b>sTNFR1</b>    | 177      | 2.75 (2.24 to 3.26)                          |
| <b>IL-6</b>      | 156      | 3.02 (2.38 to 3.66)                          |
| <b>sICAM-1</b>   | 177      | 3.40 (2.98 to 3.82)                          |
| <b>sVCAM-1</b>   | 177      | 2.24 (1.98 to 2.50)                          |
| <b>IP-10</b>     | 176      | 2.84 (2.41 to 3.27)                          |
| <b>Ang-1</b>     | 176      | 1.77 (1.53 to 2.01)                          |

Displayed are mean coefficients of variation with 95% confidence intervals. Biomarkers were measured using the Luminex multiplex platform in samples from 152 to 177 patients; biomarker values outside the dynamic range of the assays were excluded for each biomarker.

## II. Supplementary Figures

### Supplementary Fig. 1: Biomarker AUROCs for children who died up to 7d or who survived in:

#### a. Derivation cohort

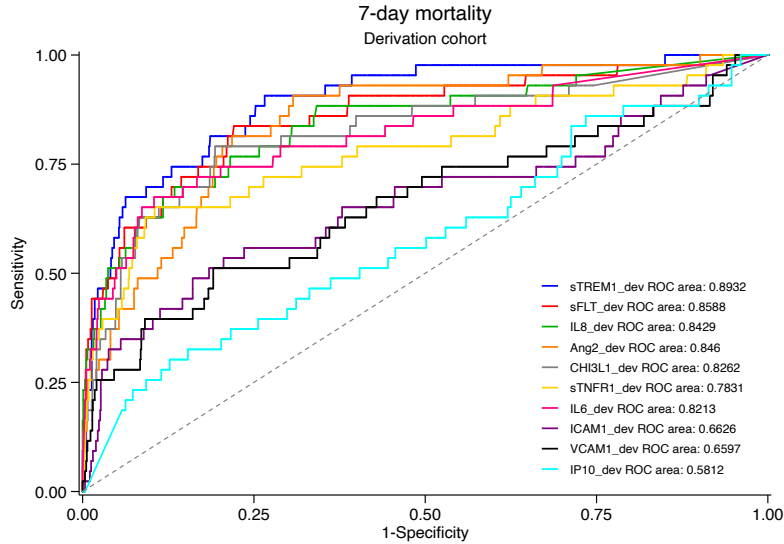

#### b. Validation cohort

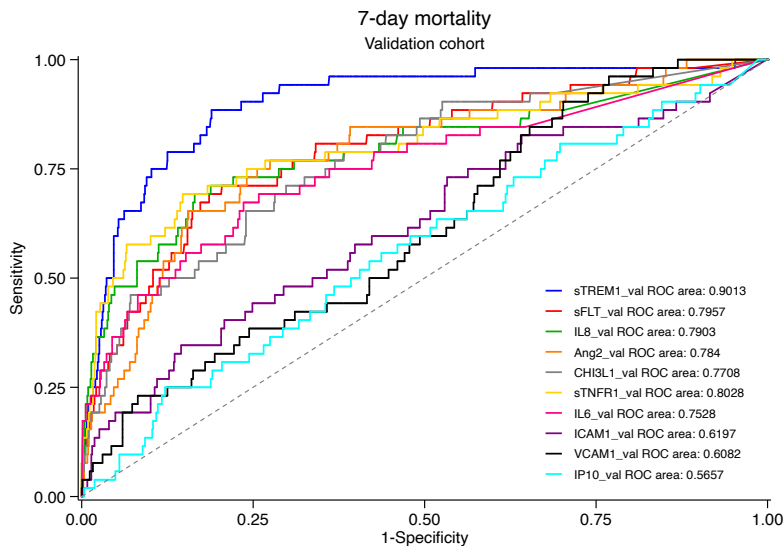

\*AUROC curves represent all biomarkers quantified in the (A) derivation (n=1176), and (B) validation (n=908) sets of the complete cohort in children included in biomarker comparative performance (data correspond to AUROC and 95% CI presented in main manuscript Table 2). Derivation cohort included children enrolled between February 15, 2012 and October 31, 2012. Validation cohort included children enrolled between November 1, 2012 and August 29, 2013.



**Supplementary Fig. 2: Distribution of sTREM-1 and probabilities of death for:**  
**a. Derivation Cohort**

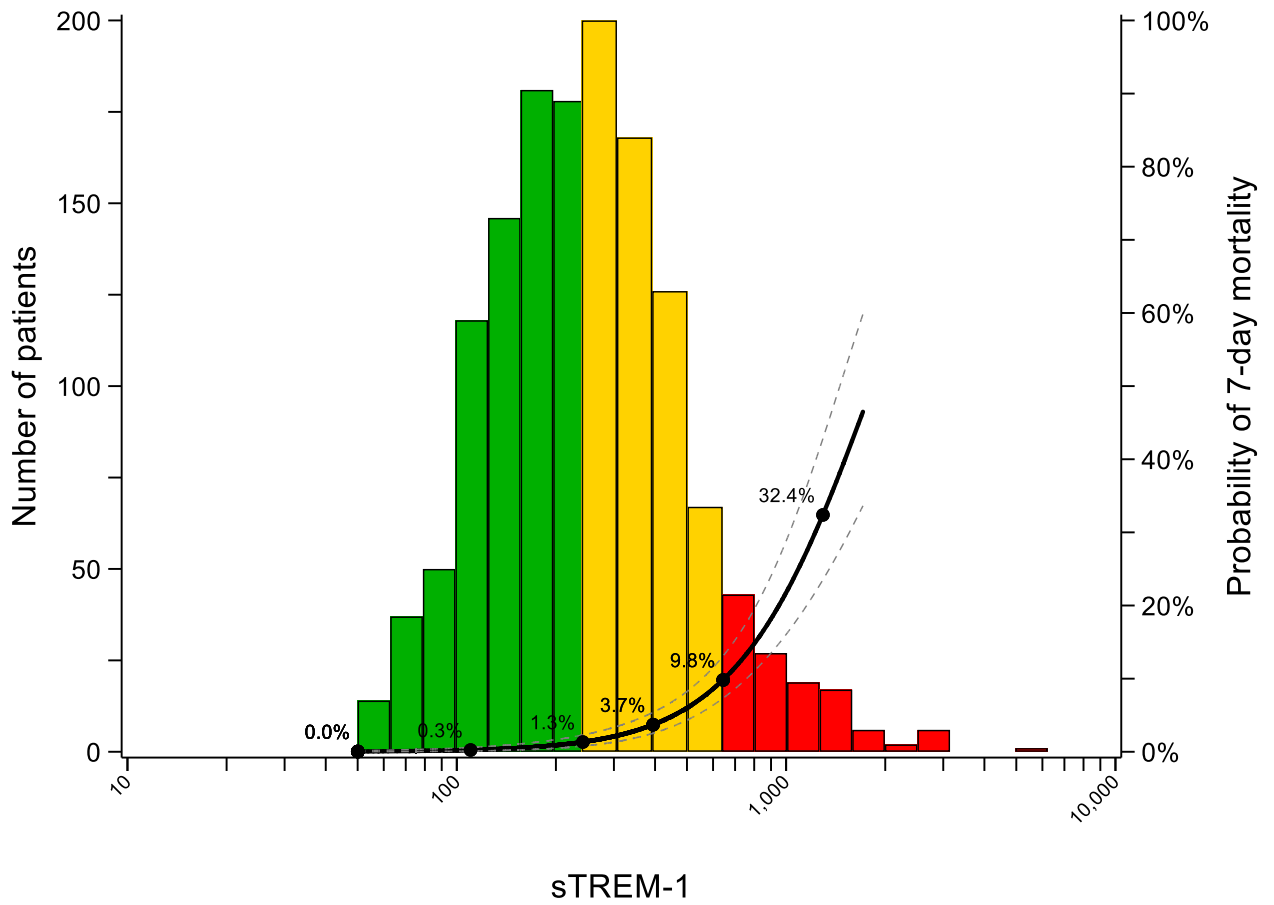

## b. Validation Cohort

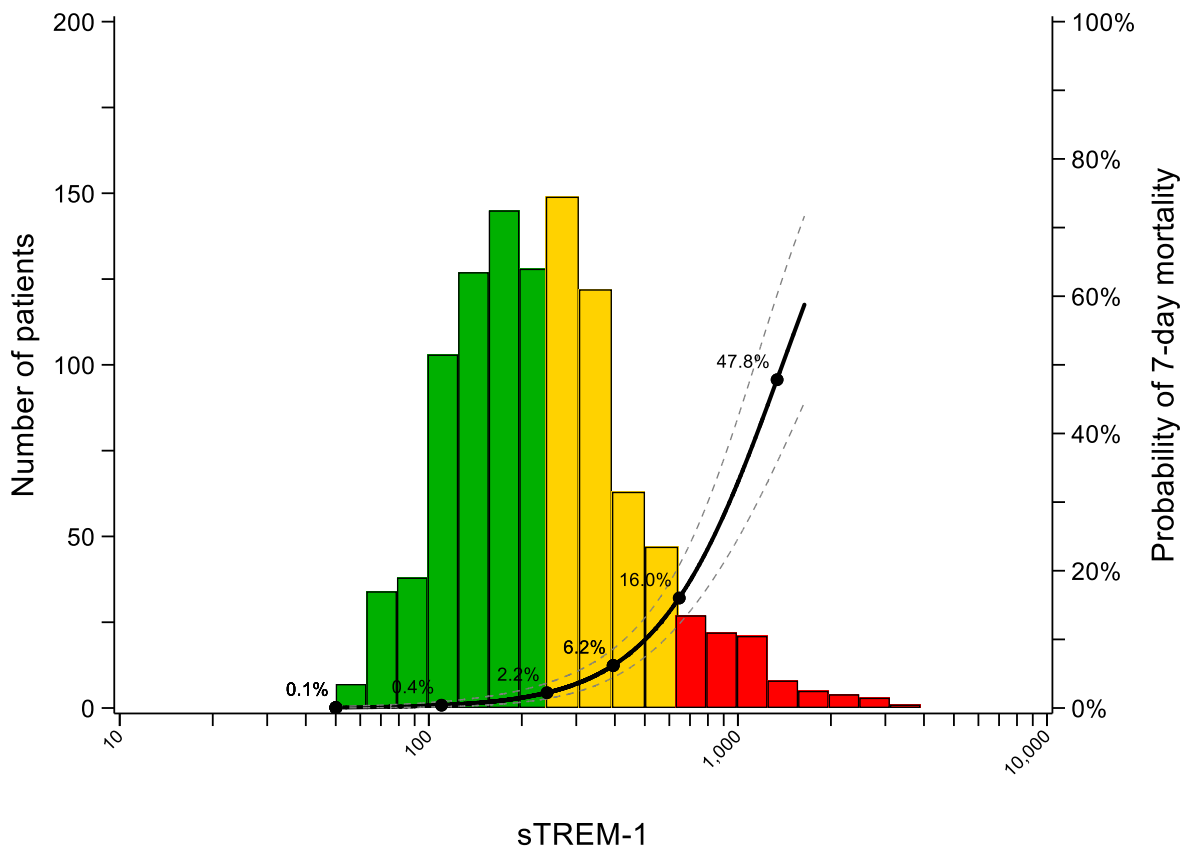

Distribution of sTREM-1 at presentation with predicted probability of 7-day mortality in the (a) derivation and (b) validation cohort. Histogram refers sTREM-1 distribution. Negative and positive Likelihood Ratios (LRs) in the derivation and validation cohorts combined were used to risk-stratify febrile children: “green” zone: low risk (LR- of 0.10, sTREM-1 <239 pg/mL), “yellow” zone: refer and monitor (sTREM-1  $\geq$ 239 pg/mL and <629 pg/mL), “red” zone: urgent admission/support (LR+ of 10, sTREM-1  $\geq$ 629 pg/mL). Derivation cohort included children enrolled between February 15, 2012 and October 31, 2012. Validation cohort included children enrolled between November 1, 2012 and August 29, 2013.

**Supplementary Fig. 3: Calibration plots for Log sTREM-1 values with multiple imputations from:**

**a. Primary Validation**

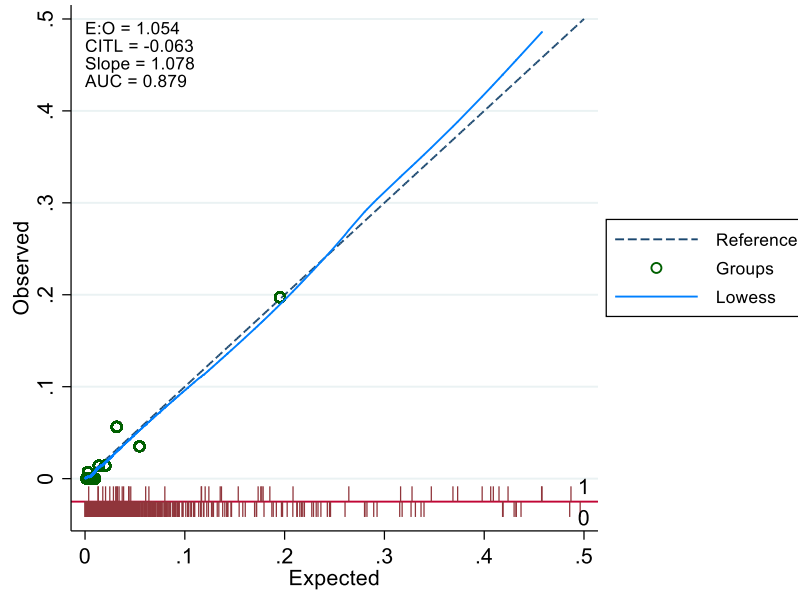

**b. Secondary Validation**

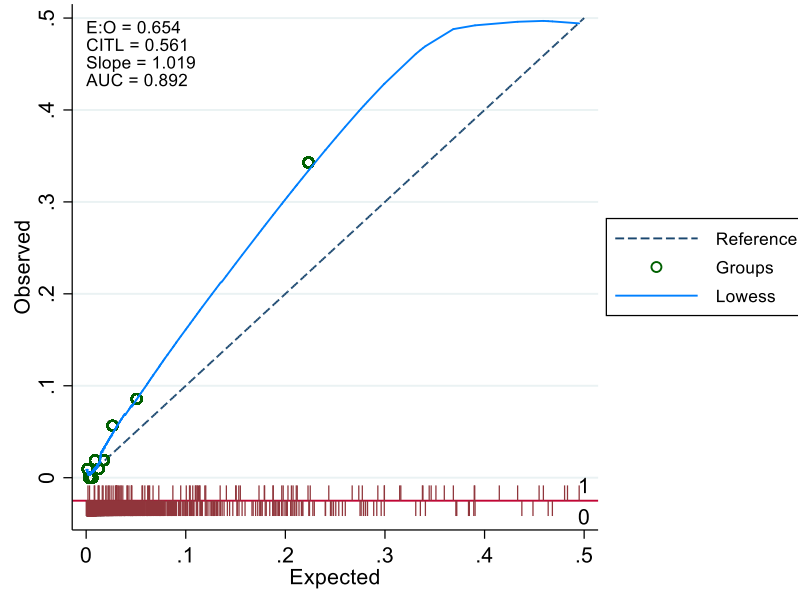

Calibration was defined as the agreement between observed and predicted mortality risk and assessed in calibration plots and calibration-in-the-large.<sup>17</sup> Primary validation was performed in the derivation cohort based on 500 bootstrap samples with replacement). Secondary validation was performed in the temporally defined validation cohort.

Abbreviations: E:O, ratio of expected to observed events for model calibration; CITL, calibration-in-the-large; AUC, Area under the curve

**Supplementary Fig. 4: Calibration plots for sTREM-1 Zones with multiple imputations from:**

**a. Primary Validation**

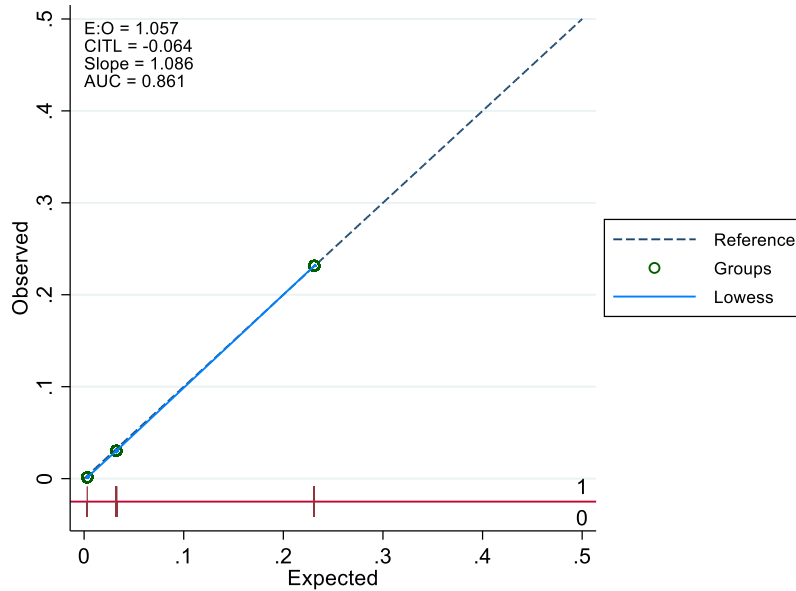

**b. Secondary Validation**

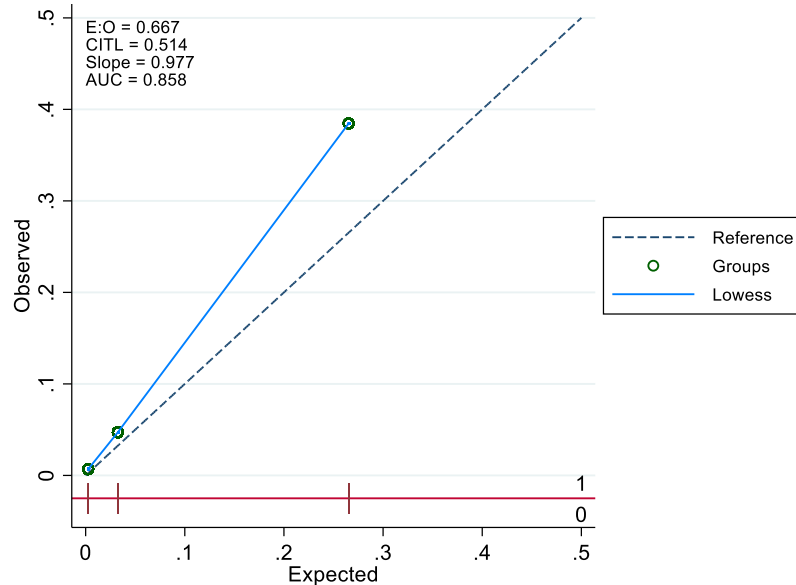

Calibration was defined as the agreement between observed and predicted mortality risk and assessed in calibration plots and calibration-in-the-large.<sup>17</sup> Primary validation was performed in the derivation cohort based on 500 bootstrap samples with replacement). Secondary validation was performed in the temporally defined validation cohort.

Abbreviations: E:O, ratio of expected to observed events for model calibration; CITL, calibration-in-the-large

**Supplementary Fig. 5: Time-to-event analyses by sTREM-1 zones in the derivation cohort for:**  
**a. Whole derivation cohort**

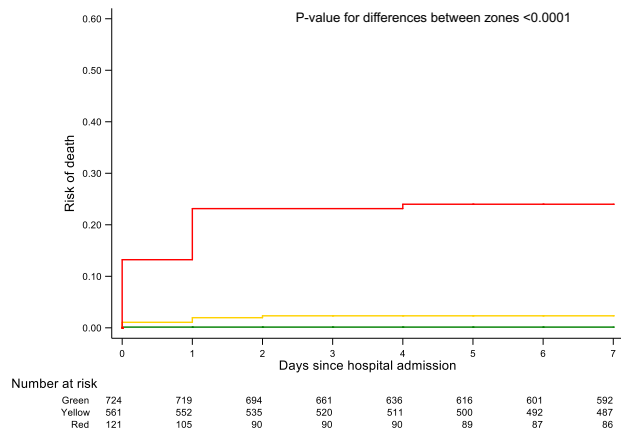

**b. Subgroup of derivation cohort with *P. falciparum* malaria**

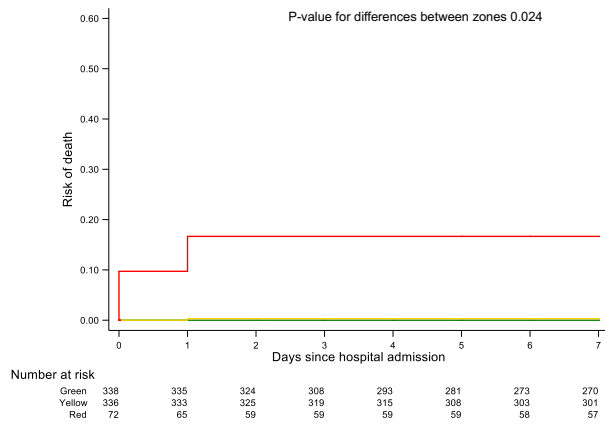

**c. Subgroup of derivation cohort without malaria**

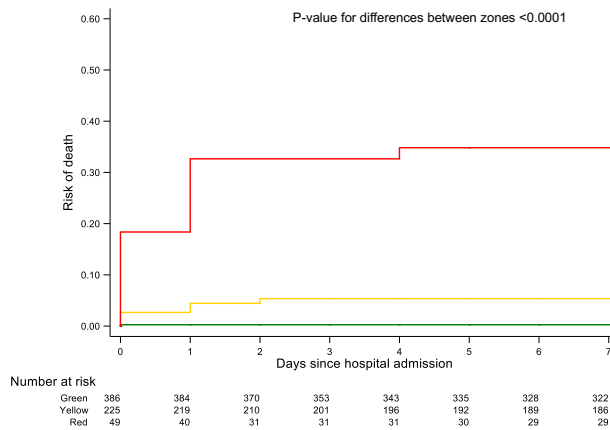

Derivation cohort included children enrolled between February 15, 2012 and October 31, 2012. Time-to-event curves were plotted based on Kaplan-Meier estimates. Wald test was used to calculate P-values for differences between zones.

**Supplementary Fig. 6: Time-to-event analyses by sTREM-1 zones in the validation cohort for:**  
**a. Whole validation cohort**

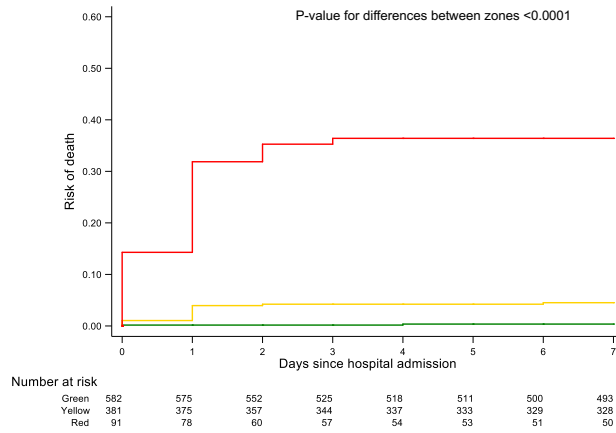

**b. Subgroup of validation cohort with *P. falciparum* malaria**

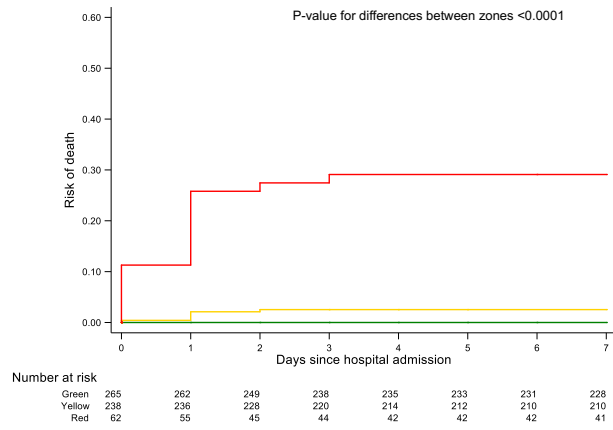

**c. Subgroup of validation cohort without malaria**

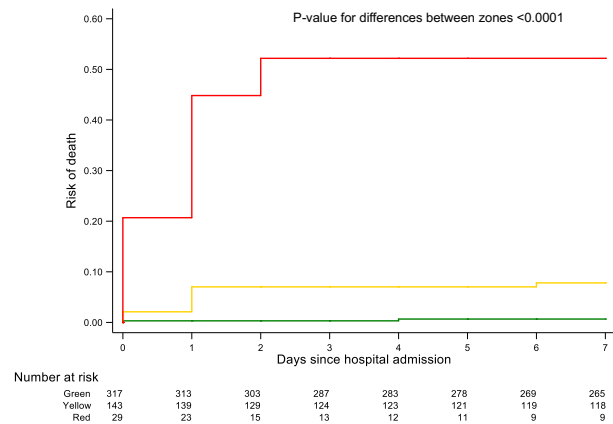

Validation cohort included children enrolled between November 1, 2012 and August 29, 2013. Time-to-event curves were plotted based on Kaplan-Meier estimates. Wald test was used to calculate P-values for differences between zones.

### III. Supplementary references

1. Gelman, A. Scaling regression inputs by dividing by two standard deviations. *Stat Med* **27**, 2865-2873 (2008).
2. Pontrelli, G., *et al.* Diagnostic value of soluble triggering receptor expressed on myeloid cells in paediatric sepsis: a systematic review. *Ital J Pediatr* **42**, 44 (2016).
3. Bellos, I., *et al.* Soluble TREM-1 as a predictive factor of neonatal sepsis: a meta-analysis. *Inflamm Res* **67**, 571-578 (2018).
4. Saldir, M., *et al.* Endocan and Soluble Triggering Receptor Expressed on Myeloid Cells-1 as Novel Markers for Neonatal Sepsis. *Pediatr Neonatol* **56**, 415-421 (2015).
5. Stein, M., Schachter-Davidov, A., Babai, I., Tasher, D. & Somekh, E. The accuracy of C-reactive protein, procalcitonin, and s-TREM-1 in the prediction of serious bacterial infection in neonates. *Clin Pediatr (Phila)* **54**, 439-444 (2015).
6. Mazzucchelli, I., *et al.* Diagnostic performance of triggering receptor expressed on myeloid cells-1 and CD64 index as markers of sepsis in preterm newborns. *Pediatr Crit Care Med* **14**, 178-182 (2013).
7. Schlapbach, L.J., *et al.* Pancreatic stone protein as a novel marker for neonatal sepsis. *Intensive Care Med* **39**, 754-763 (2013).
8. Sarafidis, K., *et al.* Diagnostic utility of elevated serum soluble triggering receptor expressed on myeloid cells (sTREM)-1 in infected neonates. *Intensive Care Med* **36**, 864-868 (2010).
9. Chen, H.L., Hung, C.H., Tseng, H.I. & Yang, R.C. Soluble form of triggering receptor expressed on myeloid cells-1 (sTREM-1) as a diagnostic marker of serious bacterial infection in febrile infants less than three months of age. *Jpn J Infect Dis* **61**, 31-35 (2008).
10. Carrol, E.D., *et al.* The diagnostic and prognostic accuracy of five markers of serious bacterial infection in Malawian children with signs of severe infection. *PLoS one* **4**, e6621 (2009).
11. Kevan, E.N., Simmons, J.R., Kocoshis, S.A., Cohen, M.B. & Rudolph, J.A. sTREM-1 and LBP in central venous catheter-associated bloodstream infections in pediatric intestinal failure. *J Pediatr Gastroenterol Nutr* **53**, 627-633 (2011).
12. Miedema, K.G., *et al.* The diagnostic value of CRP, IL-8, PCT, and sTREM-1 in the detection of bacterial infections in pediatric oncology patients with febrile neutropenia. *Support Care Cancer* **19**, 1593-1600 (2011).
13. Arzanian, M.T., *et al.* Association of serum soluble triggering receptor expressed on myeloid cells levels in malignant febrile neutropenic patients with bacteremia and fungemia. *Iran J Pediatr* **21**, 301-306 (2011).
14. Arizaga-Ballesteros, V., *et al.* Can sTREM-1 predict septic shock & death in late-onset neonatal sepsis? A pilot study. *Int J Infect Dis* **30**, 27-32 (2015).
15. Adly, A.A., Ismail, E.A., Andrawes, N.G. & El-Saadany, M.A. Circulating soluble triggering receptor expressed on myeloid cells-1 (sTREM-1) as diagnostic and prognostic marker in neonatal sepsis. *Cytokine* **65**, 184-191 (2014).

16. Erdman, L.K., *et al.* Combinations of host biomarkers predict mortality among Ugandan children with severe malaria: a retrospective case-control study. *PLoS one* **6**, e17440 (2011).
17. Steyerberg, E.W. *Clinical Prediction Models: A Practical Approach to Development, Validation, and Updating*, (Springer, New York, NY, 2009).
